# Supplementary material for: Intrinsic TGF-β2-triggered SDF-1-CXCR4 signaling axis is crucial for drug resistance and a slow-cycling state in bone marrow-disseminated tumor cells
Source: PubMed Central journal article supplement (PMC4359213; doi:10.18632/oncotarget.2826), 2014-11-25
Supplement: oncotarget-06-1008-s001.pdf [file oncotarget-06-1008-s001.pdf]

## Intrinsic TGF- $\beta$ 2-triggered SDF-1-CXCR4 signaling axis is crucial for drug resistance and a slow-cycling state in bone marrow-disseminated tumor cells

### Supplementary Material

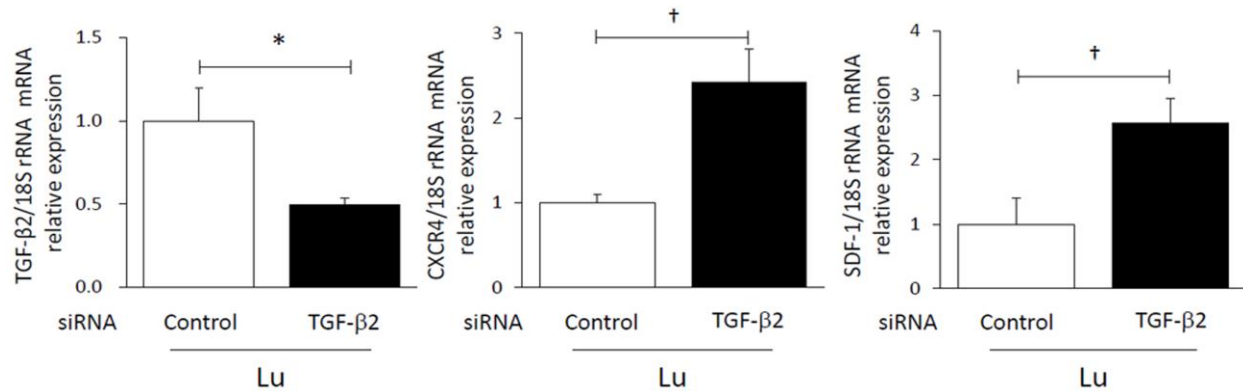

Supplementary Figure S1: Effects of TGF- $\beta$ 2 knockdown on CXCR4 and SDF-1 expression in Lu-HEp3 cells. Expression levels of TGF- $\beta$ 2 (left), CXCR4 (middle), and SDF-1 (right) mRNAs in Lu-HEp3 (Lu) cells was measured by means of qRT-PCR 48 hours after TGF- $\beta$ 2 siRNA transfection. \* $P < .05$ , † $P < .01$ . Values are means  $\pm$  SEM of triplicate samples.

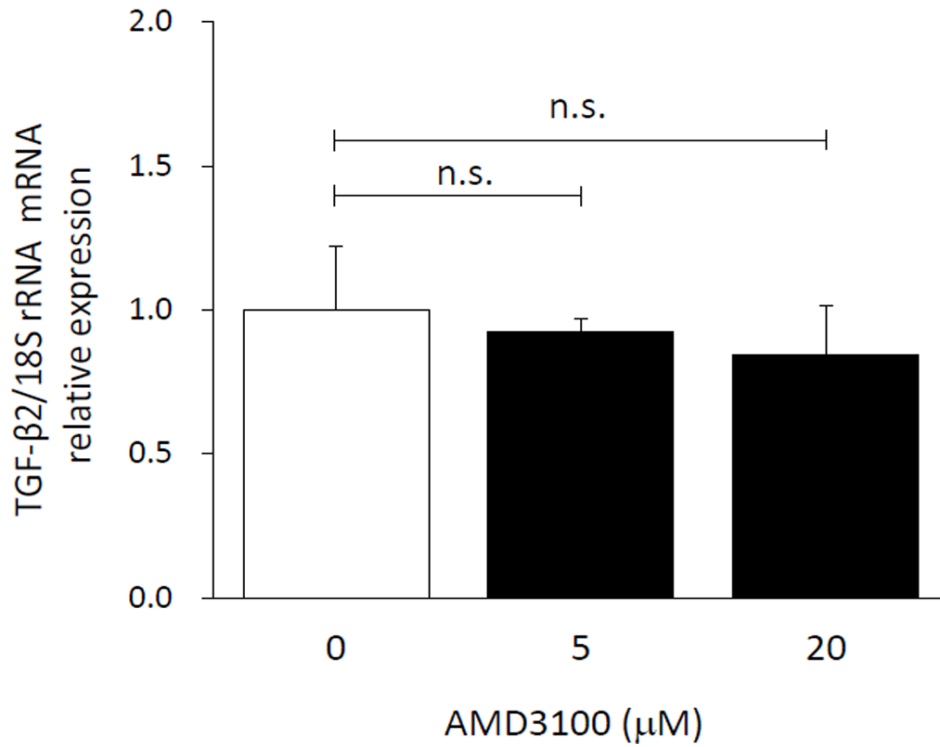

Supplementary Figure S2: Effects of CXCR4 inhibition on TGF-β2 expression in BM-HEp3 cells. TGF-β2 mRNA expression in BM-HEp3 cells treated with AMD3100 at the indicated concentrations for 24 hours was determined via qRT-PCR. n.s., not significant. Values are means ± SEM of triplicate samples.
